# Supplementary material for: Prediction of Mortality and Postoperative Complications using the Hip-Multidimensional Frailty Score in Elderly Patients with Hip Fracture
Source: PubMed Central journal article supplement (PMC5324046; doi:10.1038/srep42966), 2017-02-24
Supplement: srep42966-s1.pdf [file srep42966-s1.pdf]

**Prediction of Mortality and Postoperative Complications using the Hip-Multidimensional Frailty Score in Elderly Patients with Hip Fracture**

Jung-Yeon Choi, MD,<sup>1</sup> Kwan-Jae Cho, MD,<sup>2</sup> Sun-wook Kim, MD,<sup>1,3</sup> MSc Sol-Ji Yoon, MD,<sup>1</sup> Min-gu Kang, MD,<sup>1</sup> Kwang-il Kim, MD, PhD,<sup>1,3,\*</sup> Young-Kyun Lee, MD, PhD,<sup>4</sup> Kyung-Hoi Koo, MD, PhD,<sup>2,4</sup> & Cheol-Ho Kim, MD, PhD<sup>1,3</sup>

<sup>1</sup>Department of Internal Medicine, Seoul National University College of Medicine, Seoul, Republic of Korea. <sup>2</sup>Department of Orthopedic Surgery, Seoul National University College of Medicine, Seoul, Republic of Korea. <sup>3</sup>Department of Internal Medicine Seoul National University Bundang Hospital, Seongnam, Republic of Korea. <sup>4</sup>Department of Orthopedic Surgery, Seoul National University Bundang Hospital, Seongnam, Republic of Korea.

**SUPPLEMENTARY TABLE 1-A. Adjusted HRs by Risk of Multidimensional Frailty**

**Model for 6-month and 1-year all-cause mortality Using Cox Regression**

|                   | <b>Age adjusted HR<br/>(95% CI)</b>    | <b>Fully Adjusted HR*<br/>(95% CI)</b> |
|-------------------|----------------------------------------|----------------------------------------|
| 6-month mortality | 5.428<br>(2.713 – 10.858) <sup>†</sup> | 3.910<br>(1.798 – 8.505) <sup>‡</sup>  |
| 1-year mortality  | 3.589<br>(2.211 – 5.825) <sup>†</sup>  | 3.393<br>(1.929 – 5.968) <sup>†</sup>  |

\*Adjusted by age, body mass index, white blood cell count, hemoglobin, cholesterol, protein, blood urea nitrogen, creatinine, and American Society of Anesthesiologists class.

<sup>†</sup> $P < 0.001$ , <sup>‡</sup> $P = 0.001$ .

CI indicates confidence interval; HR, hazard ratio

**SUPPLEMENTARY TABLE 1-B. Comparison of Postoperative Complications, Institutionalization and Prolonged Hospital Stay according to Hip-MFS risk group.**

|                                          | <b>Low-risk Hip-MFS<br/>(Hip-MFS ≤ 8)<br/>(n=364)</b> | <b>High risk Hip-MFS<br/>(Hip-MFS &gt; 8)<br/>(n=117)</b> | <b>P Values*</b>  |
|------------------------------------------|-------------------------------------------------------|-----------------------------------------------------------|-------------------|
| Postoperative complications <sup>†</sup> | 122 (33.5%)                                           | 61 (52.1%)                                                | <b>&lt; 0.001</b> |
| Institutionalization*                    | 204 (56.2%)                                           | 78 (69.6%)                                                | <b>0.011</b>      |
| Prolonged total hospital stay            | 70 (19.2%)                                            | 35 (29.9%)                                                | <b>0.015</b>      |
| Prolonged postoperative hospital stay    | 83 (22.8%)                                            | 40 (34.2%)                                                | <b>0.014</b>      |

P value comparing high-risk Hip-MFS group and low-risk Hip-MFS group by  $\chi^2$  or Fisher's exact test.

\*Data not included 6 patients because of in-hospital mortality..

**SUPPLEMENTARY TABLE 2. Comparison of Baseline Demographic Characteristics between Participants and Non-participants of the study.**

|                                      | <b>Participants<br/>(n = 481)</b> | <b>Non-participants<br/>(n = 594)</b> | <b>P Values</b> |
|--------------------------------------|-----------------------------------|---------------------------------------|-----------------|
| <b>Demographic</b>                   |                                   |                                       |                 |
| Age (year)                           | 80.5 (6.9)                        | 80.3 (7.0)                            | 0.620           |
| Sex (male/female)                    | 139/342                           | 158/436                               | 0.402           |
| Weight (kg)                          | 52.7 (10.5)                       | 53.4 (11.1)                           | 0.297           |
| Body mass index (kg/m <sup>2</sup> ) | 21.4 (3.6)                        | 21.7 (3.9)                            | 0.152           |
| ASA class (1/2/3/4)*                 | 29/288/147/4                      | 32/355/182/7                          | 0.918           |
| Fracture site (intra/extra)          | 235/246                           | 280/314                               | 0.575           |
| HTN                                  | 328 (68.2%)                       | 386 (65.0%)                           | 0.268           |
| DM                                   | 163 (33.9%)                       | 201 (33.8%)                           | 0.986           |
| History of MI                        | 57 (11.9)                         | 65 (10.9%)                            | 0.641           |
| Heart Failure                        | 11 (2.3%)                         | 21 (3.5%)                             | 0.231           |
| History of CVA                       | 100 (20.8%)                       | 105 (17.7%)                           | 0.196           |
| Chronic Kidney Disease               | 36 (7.5%)                         | 54 (9.1%)                             | 0.344           |
| Chronic Liver Disease                | 22 (4.6%)                         | 27 (4.5%)                             | 0.982           |

Data are presented as mean (SD) or number (%).

ASA indicates American Society of Anesthesiologists; HTN, Hypertension; DM, Diabetes mellitus; MI, Myocardial infarction;

\*Data were missing for 30 patients.

Supplementary Figure S1. Distribution of the patient's Koval grades according to Hip-MFS.

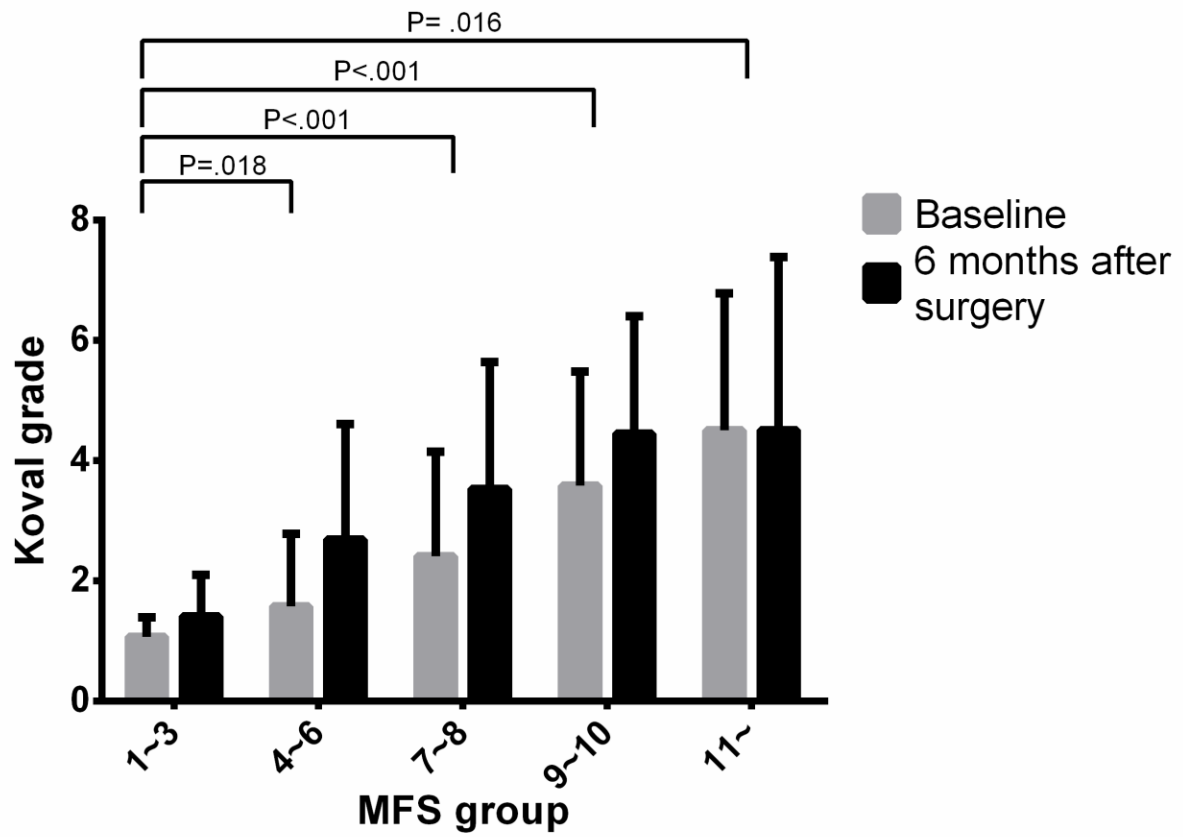

**Supplementary Figure S1. Distribution of the patient's Koval grades according to Hip-MFS.**

Plots of mean  $\pm$  standard deviation of the Koval grade according to the risk of Hip-MFS at baseline and 6 months after hip fracture surgery. Bars denotes means and horizontal bars denotes standard deviations. P-values shown denote statistical significance of between-group deterioration of Koval grade from baseline and 6 months after surgery by post hoc analysis. The P values of the post hoc analysis between the group of the Hip-MFS from 1 to 3 and group of the Hip-MFS from 4 to 6 or 7 to 8 or 9 to 10 or more than 11 were 0.018, < 0.001, < 0.001 and 0.016, respectively.
